# Supplementary material
Source: HighWire-hosted journal article supplement (http://www.annfammed.org/highwire/filestream/729/field_highwire_adjunct_files/0/Lin_Supp_Apps.pdf)
Supplement: Lin_Supp_Apps.pdf [file Lin_Supp_Apps.pdf]

**Supplemental materials for:**

Lin L, Knudsen HK. Comparing buprenorphine-prescribing physicians across nonmetropolitan and metropolitan areas in the United States. *Ann Fam Med*. 2019;17(3):212-220.

## Supplemental Tables

**Supplemental Table 1.** Characteristics of the full sample and number of complete cases by variable

|                                                      | % (N) or Mean (SD) | Complete cases <sup>a</sup> |
|------------------------------------------------------|--------------------|-----------------------------|
| Location of practice                                 |                    | 1,174                       |
| Large metropolitan area                              | 56.2% (660)        |                             |
| Small metropolitan area                              | 32.5% (382)        |                             |
| Nonmetropolitan area                                 | 11.2% (132)        |                             |
| Medical specialty                                    |                    | 1,149                       |
| Primary care                                         | 39.6% (455)        |                             |
| Addiction/Psychiatry                                 | 48.7% (560)        |                             |
| All others                                           | 11.7% (134)        |                             |
| Practice                                             |                    | 1,155                       |
| Individual medical practice                          | 50.8% (587)        |                             |
| All other practice settings                          | 47.2% (568)        |                             |
| Years prescribing buprenorphine                      | 6.7 (3.9)          | 1,124                       |
| Waiver type                                          |                    | 1,174                       |
| 30 patient limit                                     | 42.2% (496)        |                             |
| 100 patient limit                                    | 57.8 (678)         |                             |
| Payment type for office visits                       |                    | 1,141                       |
| Only cash                                            | 19.5% (223)        |                             |
| Private Insurance but not Medicaid                   | 23.8% (272)        |                             |
| Medicaid (with or without private insurance)         | 51.9% (592)        |                             |
| All others                                           | 4.7% (54)          |                             |
| Age                                                  | 55.5 (11.4)        | 1,160                       |
| Gender                                               |                    |                             |
| Female                                               | 22.9% (267)        | 1,165                       |
| Male                                                 | 77.1% (898)        |                             |
| Race                                                 |                    | 1,148                       |
| White                                                | 76.5% (878)        |                             |
| Asian                                                | 12.5% (144)        |                             |
| All others                                           | 11.0% (126)        |                             |
| Region                                               |                    | 1,174                       |
| New England                                          | 10.7% (126)        |                             |
| Middle Atlantic                                      | 16.6% (195)        |                             |
| East North Central                                   | 12.9% (151)        |                             |
| West North Central                                   | 3.4% (40)          |                             |
| South Atlantic                                       | 19.6% (230)        |                             |
| East South Central                                   | 6.1% (72)          |                             |
| West South Central                                   | 6.7% (79)          |                             |
| Mountain                                             | 7.3% (86)          |                             |
| Pacific                                              | 16.6% (195)        |                             |
| % new patients inducted onto buprenorphine in office | 44.9 (41.9)        | 1,141                       |

|                                                                                                                               |             |       |
|-------------------------------------------------------------------------------------------------------------------------------|-------------|-------|
| % new patients who were inducted at home                                                                                      | 35.5 (41.2) | 1,137 |
| % new patients who were already using street buprenorphine                                                                    | 21.3 (24.0) | 1,136 |
| % of patients in the past year with heroin use disorder                                                                       | 23.5 (22.4) | 1,135 |
| % of patients in the past year with prescription opioid use disorder                                                          | 54.5 (27.3) | 1,134 |
| % of patients in the past year with both heroin and prescription opioid use disorder                                          | 22.8 (19.9) | 1,133 |
| Typical frequency of office visits in initial treatment (i.e., first 60 days)                                                 |             | 1,131 |
| Every week or more frequently                                                                                                 | 26.6% (301) |       |
| Every two weeks                                                                                                               | 35.5% (401) |       |
| Once a month or less                                                                                                          | 37.9% (429) |       |
| Typical frequency of office visits in maintenance treatment (i.e., after 60 days) for stable patients                         |             | 1,127 |
| Every two weeks or more frequently                                                                                            | 15.6% (176) |       |
| Once a month                                                                                                                  | 73.1% (824) |       |
| Every two months or less frequently                                                                                           | 11.3% (127) |       |
| Typical visit frequency in maintenance treatment for unstable patients (e.g., continued opioid use, misusing benzodiazepines) |             | 1,130 |
| Every week                                                                                                                    | 38.9% (440) |       |
| Every two weeks                                                                                                               | 38.5% (435) |       |
| Once a month or less frequently                                                                                               | 16.8% (190) |       |
| Patient would no longer be seen                                                                                               | 5.8% (65)   |       |
| Typical buprenorphine dose for stable patients in maintenance treatment                                                       |             | 1,115 |
| ≤8 mg                                                                                                                         | 29.0% (323) |       |
| 9-12 mg                                                                                                                       | 26.5% (296) |       |
| 14-16 mg                                                                                                                      | 39.6% (441) |       |
| >16 mg                                                                                                                        | 4.9% (55)   |       |
| Maximum buprenorphine dose for stable patients in maintenance treatment                                                       |             | 1,102 |
| <16 mg                                                                                                                        | 12.0% (132) |       |
| 16 mg                                                                                                                         | 33.6% (370) |       |
| 17-24 mg                                                                                                                      | 41.9% (462) |       |
| >24 mg                                                                                                                        | 12.5% (138) |       |
| % past-year patients who received counseling from the respondent                                                              | 53.5 (43.9) | 1,119 |
| % past-year patients who received counseling from providers in the respondent's practice                                      | 38.0 (41.2) | 1,108 |
| % past-year patients who received counseling from external providers                                                          | 38.9 (32.7) | 1,096 |

|                                                                                                                                                                             |             |       |
|-----------------------------------------------------------------------------------------------------------------------------------------------------------------------------|-------------|-------|
| % past-year patients who did not receive any psychosocial counseling                                                                                                        | 12.4 (20.1) | 1,079 |
| % past-year patients referred to more intensive level of care                                                                                                               | 16.8 (19.5) | 1,136 |
| Setting has resources to provide medical services to patients with complex medical problems <sup>b</sup>                                                                    | 3.4 (1.4)   | 1,148 |
| Setting has resources to provide psychiatric services to patients with complex psychiatric problems (e.g., serious/persistent mental illness) <sup>b</sup>                  | 3.2 (1.5)   | 1,148 |
| Setting has resources to provide social services to patients with complex social problems (e.g., unstable housing, criminal justice involvement, unemployment) <sup>b</sup> | 2.7 (1.3)   | 1,142 |

<sup>a</sup> Models would have had sample sizes ranging from 968 (82.5% of cases) to 1,020 (86.9% of cases) if listwise deletion was used.

<sup>b</sup> Physicians were asked to describe the resources available within their practice using a five-point Likert scale ranging from 1=strongly disagree to 5=strongly agree.

**Supplemental Table 2.** Characteristics of physicians who responded compared to all who were surveyed<sup>a</sup>.

|                                                                        | All Who Were Mailed the Survey<br>n=3,553<br>% (N) or Mean (SD) | Respondents<br>n=1,174<br>% (N) or Mean (SD) |
|------------------------------------------------------------------------|-----------------------------------------------------------------|----------------------------------------------|
| Waiver type                                                            |                                                                 |                                              |
| 100 patient waiver                                                     | 52.3% (1,858)                                                   | 57.8% (678)                                  |
| 30 patient waiver                                                      | 47.7% (1,695)                                                   | 42.3% (496)                                  |
| Gender per online resources (e.g., HealthGrades)                       |                                                                 |                                              |
| Male                                                                   | 77.1% (2,721)                                                   | 77.1% (896)                                  |
| Female                                                                 | 22.9% (808)                                                     | 22.9% (266)                                  |
| Number of practice locations per online resources (e.g., HealthGrades) | 1.40 (0.80)                                                     | 1.35 (0.71)                                  |
| Rural-Urban                                                            |                                                                 |                                              |
| Large metropolitan                                                     | 60.4% (2,146)                                                   | 56.2% (660)                                  |
| Small metropolitan                                                     | 30.1% (1,070)                                                   | 32.5% (382)                                  |
| Nonmetropolitan                                                        | 9.5% (337)                                                      | 11.2% (132)                                  |
| US Census Division                                                     |                                                                 |                                              |
| New England                                                            | 9.9% (351)                                                      | 10.7% (126)                                  |
| Middle Atlantic                                                        | 16.0% (569)                                                     | 16.6% (195)                                  |
| East North Central                                                     | 10.0% (355)                                                     | 12.9% (151)                                  |
| West North Central                                                     | 3.1% (109)                                                      | 3.4% (40)                                    |
| South Atlantic                                                         | 22.5% (800)                                                     | 19.6% (230)                                  |
| East South Central                                                     | 6.0% (212)                                                      | 6.1% (72)                                    |
| West South Central                                                     | 10.1% (358)                                                     | 6.7% (79)                                    |
| Mountain                                                               | 7.8% (276)                                                      | 7.3% (86)                                    |
| Pacific                                                                | 14.7% (523)                                                     | 16.6% (195)                                  |

<sup>a</sup> Data on gender were not available online for 67 of 3,553 physicians who were mailed the survey, and for 12 physicians who responded to the survey. Data on number of practice locations were not available online for 67 of 3,553 physicians who were mailed the survey, and for 29 physicians who responded to the survey. Percentages may not sum to 100 due to rounding.
